# Supplementary material
Source: PubMed Central journal article supplement (PMC3545303)

## Supplementary Material and Methods

### **Homing of CTO-stained dDCs**

EpCAM negative dDCs were isolated from wt and Mrp14 <sup>-/-</sup> mice 48h after challenge with DNFB and stained with cell tracker orange (CTO; 5 $\mu$ M; Molecular Probes, Darmstadt, Germany). 9x10<sup>6</sup> of the stained wt and Mrp14 <sup>-/-</sup> cells were injected in the tail veins of two identical groups of DNFB-sensitized wt mice prior to challenge. After 48h the immigration of CTO positive cells into ear-draining LNs was determined by flow cytometry.

### **FITC application**

Ears of naïve C57BL/6 wt and Mrp14 <sup>-/-</sup> mice were painted with 30 $\mu$ l 0.5% FITC in an acetone/dibutylphthalate mixture (Sigma-Aldrich, Munich, Germany). After 18h ear-draining LNs were analyzed for immigrated FITC positive cells by flow cytometry.

## Supplementary Figure legends

**Figure S1.** Histological analyses of wt and Mrp14 <sup>-/-</sup> ear sections from control ears, treated with acetone/olive oil only. Sections were stained for immune cells (CD11b<sup>+</sup> myeloid cells, Gr-1<sup>+</sup> granulocytes, F4/80<sup>+</sup> macrophages) as well as for Mrp8 and Mrp14. Scale bar: 250µm.

**Figure S2.** Identical cellular homing capacities of wt and Mrp14 <sup>-/-</sup> dDCs. **(A)** EpCAM negative dDCs were isolated from wt and Mrp14 <sup>-/-</sup> mice 48h after challenge with DNFB and stained with CTO. Subsequently, two identical groups of DNFB-sensitized wt mice were injected intravenously with these CTO-stained wt or Mrp14 <sup>-/-</sup> dDCs (9x10<sup>6</sup> dDCs per mouse) immediately before challenge with 0.4% DNFB. After 48h the immigration of CTO positive dDCs into ear-draining LNs was determined by flow cytometry. **(B)** Ears of naïve C57BL/6 wt and Mrp14 <sup>-/-</sup> mice were painted with 30µl 0.5% FITC. After 18h ear-draining LNs were analyzed for immigrated FITC positive cells by flow cytometry.

Figure S1

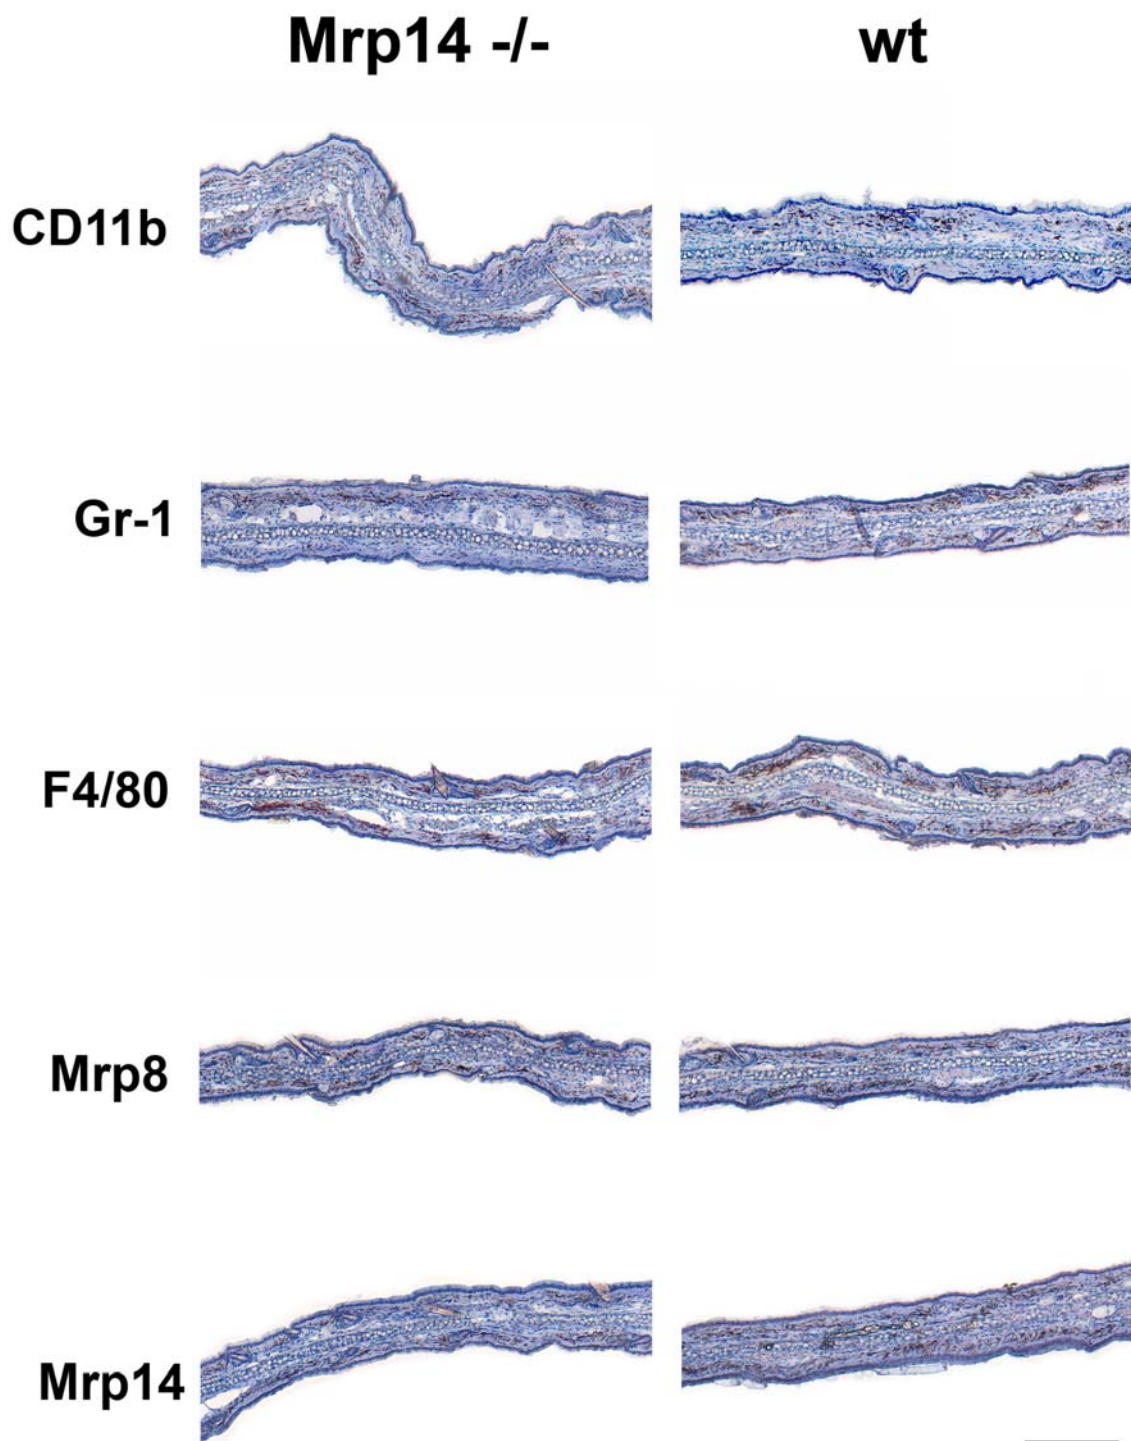

Figure S2

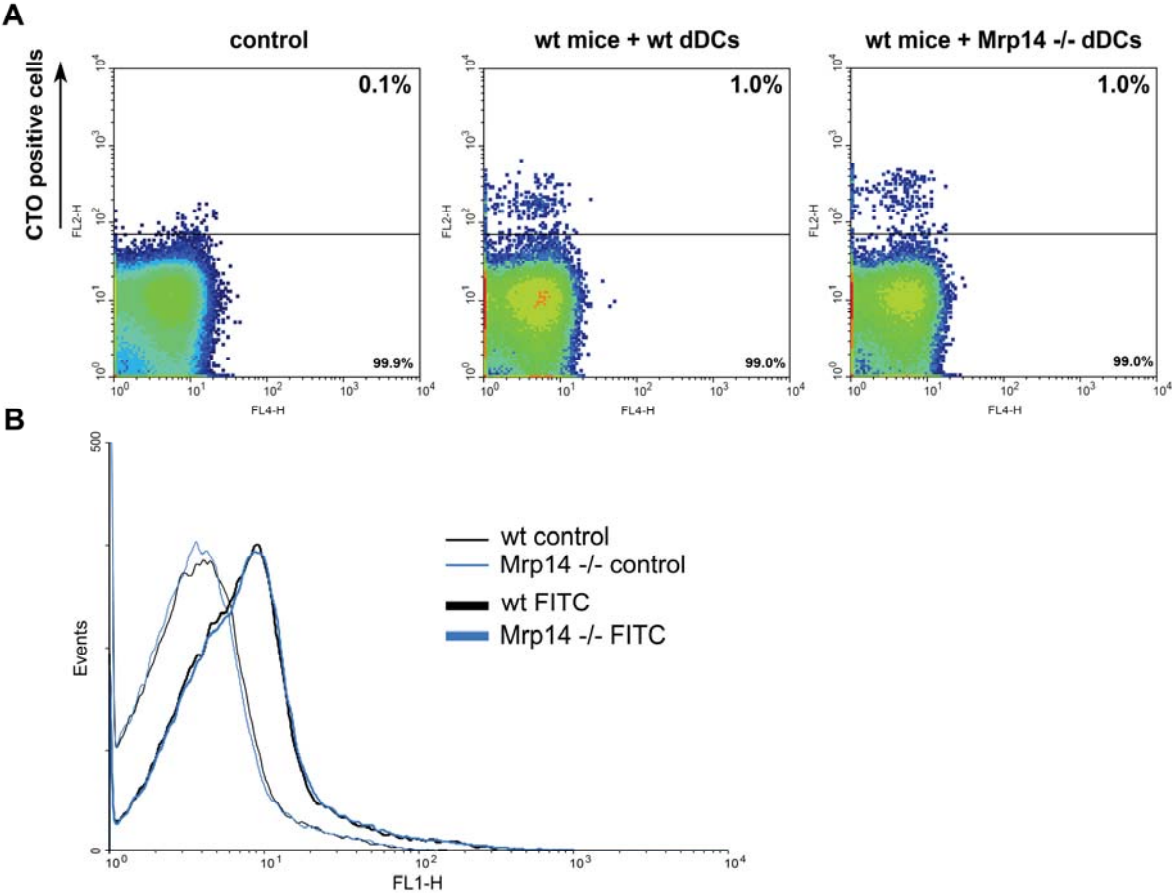

Supplement: emboj2012309s1.pdf [file emboj2012309s1.pdf]
